# Supplementary material for: Interphase human chromosome exhibits out of equilibrium glassy dynamics
Source: PubMed Central journal article supplement (PMC6082855; doi:10.1038/s41467-018-05606-6), 2018-08-08
Supplement: 41467_2018_5606_MOESM2_ESM.pdf [file 41467_2018_5606_MOESM2_ESM.pdf]

## Description of Additional Supplementary Files

### **File Name: Supplementary Movie 1**

**Description:** This movie shows the organization process of chromosome. The coloring of segments corresponds to genomic distance from one endpoint, ranging from red to green to blue.
